# Supplementary material for: KLF3 and PAX6 are candidate driver genes in late-stage, MSI-hypermutated endometrioid endometrial carcinomas
Source: bioRxiv or medRxiv preprint supplement (doi:10.1101/2021.04.26.21256125), 2021-04-30
Supplement: Supplementary file [file media-1.pdf]

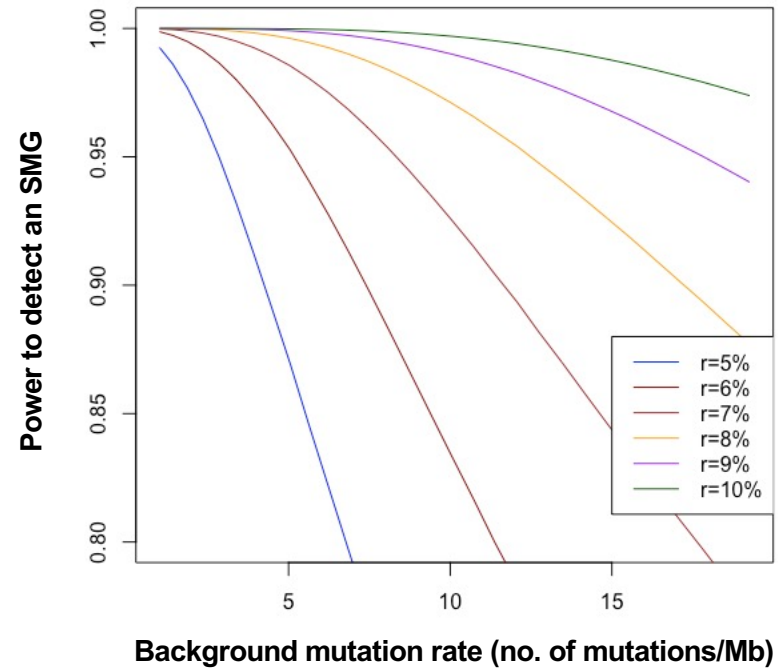

**S1 Figure.** Power to detect significantly mutated genes (SMGs) in early-stage tumors. Curves show statistical power for different percentages ( $r$ ) of tumors that are somatically mutated. Calculations were performed as described in the text, assuming 270 tumors and 14 gene tests completed.
